# Supplementary material
Source: PubMed Central journal article supplement (PMC7561919)
Supplement: mmc1.pdf [file mmc1.pdf]

# THE LANCET

## Gastroenterology & Hepatology

### Supplementary appendix

This appendix formed part of the original submission and has been peer reviewed.  
We post it as supplied by the authors.

Supplement to: Webb GJ, Marjot T, Cook JA, et al. Outcomes following SARS-CoV-2 infection in liver transplant recipients: an international registry study.  
*Lancet Gastroenterol Hepatol* 2020; published online Aug 28. [https://doi.org/10.1016/S2468-1253\(20\)30271-5](https://doi.org/10.1016/S2468-1253(20)30271-5).

**Outcomes following SARS-CoV-2 infection in liver transplant recipients: an international registry study: Supplementary data**

**Supplementary tables**

**Supplementary table 1 – Supporting societies and routes of advertisement**

**Society or route of advertisement**

---

European Association for the Study of the Liver  
United European Gastroenterology  
International Liver Cancer Association  
British Society of Gastroenterology  
British Association for the Study of the Liver  
Hepatology Society of the Philippines  
Gastroenterological Society of Australia  
Australia and New Zealand Liver Transplant Registry  
British Liver Trust  
European Liver Patients' Association  
Hellenic Association for the Study of the Liver

---

*Twitter:*

@COVIDHep  
@SECUREcirrhosis

---

**Supplementary table 2 – Reported ethnicity of transplant cases**

| <b>Reported ethnicity</b> | <b>n</b> | <b>%</b> |
|---------------------------|----------|----------|
| White                     | 111      | 74%      |
| African American          | 16       | 11%      |
| South-East Asian          | 11       | 7%       |
| Hispanic                  | 6        | 4%       |
| Unknown                   | 4        | 3%       |
| East Asian                | 2        | 1%       |
| Arabic                    | 2        | 1%       |

*One patient had two recorded ethnicities*

**Supplementary table 3 – Countries of origin**

| <b>Country</b> | <b>n</b> | <b>Percentage</b> |
|----------------|----------|-------------------|
| USA            | 55       | 36%               |
| UK             | 29       | 19%               |
| Middle East*   | 18       | 12%               |
| Italy          | 15       | 10%               |
| Mexico         | 7        | 5%                |
| Canada         | 6        | 4%                |
| Sweden         | 5        | 3%                |
| Belgium        | 3        | 2%                |
| Netherlands    | 3        | 2%                |
| Brazil         | 1        | 1%                |
| Switzerland    | 1        | 1%                |
| Germany        | 1        | 1%                |
| Egypt          | 1        | 1%                |
| Spain          | 1        | 1%                |
| Greece         | 1        | 1%                |
| India          | 1        | 1%                |
| Philippines    | 1        | 1%                |
| Portugal       | 1        | 1%                |
| Turkey         | 1        | 1%                |

\* = country known but unspecified at submitter's request.

**Supplementary table 4 – Disease aetiologies requiring transplantation**

| <b>Aetiologies</b> | <b>n</b> | <b>Percentage</b> |
|--------------------|----------|-------------------|
| HCV                | 26       | 17%               |
| NASH               | 20       | 13%               |
| Other              | 20       | 13%               |
| Alcohol            | 19       | 13%               |
| PSC                | 19       | 13%               |
| HBV                | 14       | 9%                |
| AIH                | 13       | 9%                |
| PBC                | 6        | 4%                |
| Alcohol HCV        | 2        | 1%                |
| HBV Other          | 2        | 1%                |
| Wilson's           | 2        | 1%                |
| AIH PBC            | 1        | 1%                |
| AIH Wilson's       | 1        | 1%                |
| HCV HBV            | 1        | 1%                |
| IGG4               | 1        | 1%                |
| NASH Alcohol HCV   | 1        | 1%                |
| NASH HBV           | 1        | 1%                |
| NASH HCV           | 1        | 1%                |
| NASH Other         | 1        | 1%                |

Supplementary table 5 – Characteristics and associations with death in comparison cohort

|                                       | Cohort (n = 627) |               | Survived (n = 469) |               | Died (n = 167) |               | Univariable analysis |              | Multivariable analysis |              |
|---------------------------------------|------------------|---------------|--------------------|---------------|----------------|---------------|----------------------|--------------|------------------------|--------------|
|                                       | Median/n         | IQR/%         | Median/n           | IQR/%         | Median/n       | IQR/%         | OR (95%CI)           | p value      | OR (95%CI)             | p value      |
| Age (years)                           | 73               | 73 (55-84)    | 63                 | 63 (50-80)    | 82             | 82 (75-88)    | 1.07 (1.06-1.09)     | <0.001       | 1.07 (1.05-1.09)       | <0.001       |
| Sex (male)                            | 329              | 52.5%         | 227                | 49.3%         | 102            | 61.1%         | 1.61 (1.12-2.31)     | <b>0.010</b> | 1.89 (1.23-2.90)       | <b>0.004</b> |
| Smoker                                | 7                | 1.1%          | 6                  | 1.3%          | 1              | 0.6%          | 0.46 (0.05-3.81)     | 0.469        | 0.38 (0.04-3.90)       | 0.415        |
| White ethnicity                       | 434              | 69.20%        | 296                | 64.40%        | 138            | 82.60%        | 2.64 (1.69-4.11)     | <0.001       | 1.21 (0.71-2.06)       | 0.492        |
| Obese (BMI >30kg/m <sup>2</sup> )     | 158              | 25.2%         | 121                | 26.3%         | 37             | 22.2%         | 0.80 (0.52-1.21)     | 0.291        | 1.06 (0.64-1.76)       | 0.810        |
| Heart disease                         | 202              | 32.2%         | 120                | 26.1%         | 82             | 49.1%         | 2.73 (1.89-3.95)     | <0.001       | 1.03 (0.65-1.61)       | 0.910        |
| Diabetes mellitus                     | 144              | 23.0%         | 96                 | 20.9%         | 48             | 28.7%         | 1.53 (1.02-2.29)     | <b>0.039</b> | 1.74 (1.08-2.80)       | <b>0.022</b> |
| Asthma                                | 69               | 11.0%         | 54                 | 11.7%         | 15             | 9.0%          | 0.74 (0.41-1.35)     | 0.331        | 0.93 (0.46-1.89)       | 0.841        |
| Chronic obstructive pulmonary disease | 59               | 9.4%          | 35                 | 7.6%          | 24             | 14.4%         | 2.04 (1.17-3.54)     | <b>0.012</b> | 1.10 (0.59-2.05)       | 0.771        |
| Other chronic lung disease            | 32               | 5.1%          | 18                 | 3.9%          | 14             | 8.4%          | 2.25 (1.09-4.63)     | <b>0.028</b> | 1.92 (0.84-4.41)       | 0.122        |
| Hypertension                          | 241              | 38.4%         | 164                | 35.7%         | 77             | 46.1%         | 1.54 (1.08-2.21)     | <b>0.018</b> | 1.01 (0.66-1.54)       | 0.978        |
| Non-liver cancer                      | 92               | 14.7%         | 56                 | 12.2%         | 36             | 21.6%         | 1.98 (1.25-3.15)     | <b>0.004</b> | 1.55 (0.90-2.65)       | 0.112        |
| Stroke or TIA                         | 73               | 11.6%         | 48                 | 10.4%         | 25             | 15.0%         | 1.51 (0.90-2.54)     | 0.119        | 0.90 (0.51-1.62)       | 0.736        |
| Chronic kidney disease                | 95               | 15.2%         | 53                 | 11.5%         | 42             | 25.1%         | -                    | -            | -                      | -            |
| Cirrhosis                             | 6                | 1.0%          | 0                  | 0.0%          | 6              | 3.6%          | -                    | -            | -                      | -            |
| Other organ transplant                | 3                | 0.5%          | 3                  | 0.7%          | 0              | 0.0%          | -                    | -            | -                      | -            |
| Prednisolone use                      | 17               | 2.7%          | 11                 | 2.4%          | 6              | 3.6%          | 1.52 (0.55-4.18)     | 0.416        | 1.19 (0.39-3.71)       | 0.758        |
| Tacrolimus use                        | 4                | 0.6%          | 4                  | 0.9%          | 0              | 0.0%          | -                    | -            | -                      | -            |
| Ciclosporin use                       | 2                | 0.3%          | 2                  | 0.4%          | 0              | 0.0%          | -                    | -            | -                      | -            |
| Sirolimus use*                        | 0                | 0.0%          | 0                  | 0.0%          | 0              | 0.0%          | -                    | -            | -                      | -            |
| Mycophenolate mofetil use             | 6                | 1.0%          | 6                  | 1.3%          | 0              | 0.0%          | -                    | -            | -                      | -            |
| Azathioprine use                      | 1                | 0.2%          | 1                  | 0.2%          | 0              | 0.0%          | -                    | -            | -                      | -            |
| Serum creatinine (mg/dL)              | 1                | 0.9 (0.7-1.1) | 1                  | 0.8 (0.7-1.1) | 1              | 1.0 (0.8-1.3) | 1.01 (0.87-1.16)     | 0.942        | 0.98 (0.79-1.21)       | 0.824        |

Hosmer-Lemeshow goodness of fit = 0.949; 546 of 627 patients included in multivariable analysis



**Supplementary table 6 – Symptoms at diagnosis among transplant and non-transplant cohorts**

| <b>Symptom profile</b>              | <b>Non-transplant<br/>(529 of 627 with data)</b> | <b>Transplant<br/>(149 of 151 with data)</b> | <b>p value</b> |
|-------------------------------------|--------------------------------------------------|----------------------------------------------|----------------|
| <b>GI symptoms only</b>             | 12 (2%)                                          | 14 (9%)                                      | -              |
| <b>Respiratory symptoms only</b>    | 378 (71%)                                        | 83 (56%)                                     | -              |
| <b>Both respiratory &amp; GI</b>    | 50 (9%)                                          | 31 (21%)                                     | -              |
| <b>Neither respiratory &amp; GI</b> | 89 (17%)                                         | 21 (14%)                                     | -              |
| <b>GI symptoms</b>                  | 62 (12%)                                         | 45 (30%)                                     | <0.001         |
| <b>Respiratory symptoms</b>         | 431 (81%)                                        | 114 (77%)                                    | 0.248          |

**Supplementary table 7 – Characteristics of groups after propensity score matching**

|                                  | Model 1 (n=144)  |                  | Model 2 (n=144)  |                  | Model 3 (n=144)  |                 | Model 4 (n=151)  |                  |
|----------------------------------|------------------|------------------|------------------|------------------|------------------|-----------------|------------------|------------------|
|                                  | Transplant       | Non-transplant   | Transplant       | Non-transplant   | Transplant       | Non-transplant  | Transplant       | Non-transplant   |
| <b>Age (years)</b>               | 60 (47–66)       | 56 (46–66)       | 60 (47–66)       | 55 (48–64)       | 60 (47–66)       | 56 (47–66)      | 60 (47–66)       | 58 (47–65)       |
| <b>Years after transplant</b>    | 5 (2–11)         | -                | 5 (2–11)         | -                | 5 (2–11)         | -               | 5 (2–11)         | -                |
| <b>Sex (male)</b>                | 95 (66%)         | 94 (65%)         | 95 (66%)         | 94 (65%)         | 95 (66%)         | 101 (70%)       | 102 (67%)        | 108 (72%)        |
| <b>Smoker</b>                    | 3 (2%)           | 7 (5%)           | 3 (2%)           | 2 (1%)           | 3 (2%)           | 3 (2%)          | 3 (2%)           | 2 (1%)           |
| <b>Ethnicity (white)</b>         | 105 (73%)        | 102 (71%)        | 105 (73%)        | 103 (72%)        | 105 (73%)        | 9 (67%)         | 111 (74%)        | 110 (73%)        |
| <b>Heart disease</b>             | 21 (15%)         | 34 (24%)         | 21 (15%)         | 28 (19%)         | 21 (15%)         | 37 (26%)        | 22 (15%)         | 26 (17%)         |
| <b>Diabetes mellitus</b>         | 61 (42%)         | 62 (43%)         | 61 (42%)         | 55 (38%)         | 61 (42%)         | 60 (42%)        | 65 (43%)         | 59 (39%)         |
| <b>Hypertension</b>              | 57 (40%)         | 56 (39%)         | 57 (40%)         | 58 (40%)         | 57 (40%)         | 55 (28%)        | 63 (42%)         | 67 (44%)         |
| <b>Cancer</b>                    | 8 (5%)           | 13 (9%)          | 8 (5%)           | 13 (9%)          | 8 (5%)           | 12 (8%)         | 8 (5%)           | 5 (3%)           |
| <b>Prednisolone</b>              | 64 (44%)         | 4 (3%)           | 64 (44%)         | 10 (7%)          | 64 (44%)         | 12 (8%)         | 67 (44%)         | 2 (1%)           |
| <b>Calcineurin inhibitor use</b> | 129 (90%)        | 2 (1%)           | 129 (90%)        | 10 (7%)          | 129 (90%)        | 18 (13%)        | 135 (89%)        | 2 (1%)           |
| <b>Antimetabolite</b>            | 86 (60%)         | 1 (1%)           | 86 (60%)         | 8 (6%)           | 86 (60%)         | 14 (10%)        | 90 (60%)         | 2 (1%)           |
| <b>Creatinine (mg/dl)</b>        | 1.2 (0.9–1.5)    | 0.9 (0.8–1.1)    | 1.2 (0.9–1.5)    | 0.9 (0.8–1.1)    | 1.2 (0.9–1.5)    | 1.0 (0.8–2.3)   | 1.2 (0.9–1.5)    | 0.9 (0.8–1.1)    |
| <b>Respiratory symptoms</b>      | 109 of 143 (76%) | 101 of 121 (83%) | 109 of 143 (76%) | 117 of 133 (88%) | 109 of 143 (76%) | 92 of 127 (72%) | 114 of 149 (77%) | 100 of 120 (83%) |
| <b>Gastrointestinal symptoms</b> | 45 of 143 (31%)  | 13 of 121 (11%)  | 45 of 143 (31%)  | 14 of 133 (11%)  | 45 of 143 (31%)  | 22 of 127 (17%) | 30 of 149 (30%)  | 13 of 120 (11%)  |

Table shows four separate propensity-score matched models with liver transplantation as the treatment variable, death as the outcome variable. For Model 1, variables included for calculation of propensity score were age, sex, obesity, white ethnicity, hypertension, diabetes mellitus, and serum creatinine; for Model 2, interactions with age were added; for Model 3, interactions with serum creatinine were added; for Model 4, serum creatinine was removed. Seven of 151 transplant patients lacked baseline data for serum creatinine and were not included in models including serum creatinine.

**Supplementary table 8 – Causes of death among transplant and non-transplant cohorts**

| <b>Mode of death</b> | <b>Transplant cohort (n=28)</b> | <b>Non-transplant (n=164)</b> |
|----------------------|---------------------------------|-------------------------------|
| Respiratory          | 21 (75%)                        | 146 (89%)                     |
| Hepatic              | 0 (0%)                          | 0 (0%)                        |
| Cardiogenic          | 2 (7%)                          | 3 (2%)                        |
| Other <sup>†</sup>   | 5 (18%)                         | 15 (9%)                       |

† = For LT patients, all ‘other’ causes of death represented multi-organ failure; among the non-transplant cohort, all those in the ‘other’ classification died from causes not immediately attributable to SARS-CoV-2 infection / COVID-19.

**Supplementary table 9 – Standardised differences and variance ratio for unmatched and propensity score matched groups**

| Variables                    | Model 1 |      |      |      | Model 2 |      |       |       | Model 3 |      |       |       | Model 4 |      |       |       |
|------------------------------|---------|------|------|------|---------|------|-------|-------|---------|------|-------|-------|---------|------|-------|-------|
|                              | UV      | MV   | USD  | MSD  | UV      | MV   | USD   | MSD   | UV      | MV   | USD   | MSD   | UV      | MV   | USD   | MSD   |
| <b>Age</b>                   | 0.55    | 0.65 | -0.9 | 0.09 | 0.55    | 1.27 | -0.93 | 0.02  | 0.55    | 0.81 | -0.93 | 0.07  | 0.49    | 1.03 | -0.75 | 0.02  |
| <b>Age#Age</b>               | -       | -    | -    | -    | 0.36    | 1.08 | -1.02 | 0.05  | 0.36    | 0.79 | -1.02 | 0.05  | 0.33    | 0.95 | -0.86 | 0.02  |
| <b>Sex</b>                   | 0.91    | 0.99 | 0.3  | 0.01 | 0.91    | 0.99 | 0.26  | 0.01  | 0.91    | 1.07 | 0.26  | -0.09 | 0.88    | 1.08 | 0.31  | -0.09 |
| <b>Obesity</b>               | 0.98    | 0.96 | 0    | 0.05 | 0.98    | 0.97 | 0.02  | 0.03  | 0.98    | 0.90 | 0.02  | 0.12  | 0.92    | 0.98 | 0.09  | 0.01  |
| <b>White ethnicity</b>       | 1.11    | 0.94 | 0.1  | 0.07 | 1.11    | 0.93 | 0.10  | -0.09 | 1.11    | 0.97 | 0.10  | -0.03 | 1.10    | 0.99 | 0.09  | -0.01 |
| <b>Hypertension</b>          | 1.32    | 1.00 | 0.4  | 0.01 | 1.32    | 1.03 | 0.38  | 0.08  | 1.32    | 1.00 | 0.38  | 0.01  | 1.39    | 1.03 | 0.44  | 0.08  |
| <b>Diabetes mellitus</b>     | 0.99    | 1.01 | 0    | 0.01 | 0.99    | 0.99 | -0.03 | -0.01 | 0.99    | 1.01 | -0.03 | 0.03  | 1.03    | 0.99 | 0.07  | -0.05 |
| <b>Creatinine</b>            | 1.02    | 1.31 | 0.3  | 0.33 | 1.02    | 0.62 | 0.28  | 0.14  | 1.02    | 1.13 | 0.28  | -0.04 | -       | -    | -     | -     |
| <b>Creatinine#Creatinine</b> | -       | -    | -    | -    | -       | -    | -     | -     | 0.46    | 2.94 | 0.07  | 0.00  | -       | -    | -     | -     |

Table shows four separate propensity-score matched models with liver transplantation as the treatment variable, death as the outcome variable. For Model 1, variables included for calculation of propensity score were age, sex, obesity, white ethnicity, hypertension, diabetes mellitus, and serum creatinine; for Model 2, interactions with age were added; for Model 3, interactions with serum creatinine were added; for Model 4, serum creatinine was removed. Seven of 151 transplant patients lacked baseline data for serum creatinine and were not included in models including serum creatinine. UV = unmatched variance, MV = matched variance, USD = unmatched standardised difference, MSD = matched standardised difference; - denotes omitted variable omitted. # denotes interactions.

**Supplementary table 10 – Liver and renal biochemistry**

| <b>Category</b>                                                                                        | <b>Transplant patients</b> | <b>Non-transplant patients</b> | <b>p value</b> |
|--------------------------------------------------------------------------------------------------------|----------------------------|--------------------------------|----------------|
| <b>Mild liver injury</b><br>(ALT >ULN)                                                                 | 36 of 121 (30%)            | 126 of 448 (28%)               | 0.734          |
| <b>Moderate liver injury</b><br>(ALT >2×ULN)                                                           | 19 of 121 (16%)            | 63 of 448 (14%)                | 0.662          |
| <b>Severe liver injury</b><br>(ALT >5×ULN)                                                             | 10 of 121 (8%)             | 17 of 448 (4%)                 | 0.052          |
| <b>Renal injury stage 2</b><br>(>2 fold rise in creatinine from baseline)                              | 27 of 129 (21%)            | 94 of 537 (18%)                | 0.374          |
| <b>Renal injury stage 3</b><br>(>3 fold rise in creatinine from baseline or renal replacement therapy) | 22 of 130 (17%)            | 74 of 537 (14%)                | 0.403          |

## Supplementary table 11– Contributors

### Contributor(s) and affiliation

---

Ahmed Hashim / David Patch, Royal Free Hospital, UK  
Ahmed Hashim / Rachel Westbrook, Royal Free Hospital, UK  
Ahmed Hashim / Aileen Marshall, Royal Free Hospital, UK  
Ahmed Hashim / Jennifer Ryan, Royal Free Hospital, UK  
Ahmed Tawheed / Mohamed El Kassas, Endemic Medicine Department Helwan University, Egypt  
Andrea De Gottardi, Ente Ospedaliero Cantonale, Switzerland  
Antonella Putignano / Thierry Gustot, CUB Erasme, Belgium  
Beth Lusina / Kelly Burak, Foothills Medical Centre, Calgary, Alberta, Canada  
Charmaine Matthews / Paul Richardson, Liverpool University Hospitals NHS Foundation Trust, UK  
Costica Aloman / Nikunj Shah, Rush University Medical Center, USA  
Costica Aloman / Sheila Eswaran, Rush University Medical Center, USA  
Costica Aloman / Costica Aloman, Rush University Medical Center, USA  
Daniele Nicolini / Marco Vivarelli, Division of Hepatobiliary, Pancreatic and Abdominal Transplant Surgery, A.O.U. "Ospedali Riuniti di Ancona", Italy  
Daniele Nicolini / Marco Vivarelli, A.O.U. Ospedali Riuniti di Ancona, Ancona, Italy, Italy  
Debbie Shawcross / Michael Heneghan, King's College Hospital, UK  
Heather Lafferty / Kenneth Simpson, Scottish Liver transplant Unit, Edinburgh Royal Infirmary, UK  
Matthew Armstrong / Ye Oo, Queen Elizabeth Birmingham / University Hospitals Birmingham, UK  
Matthew Armstrong / James Ferguson, Queen Elizabeth Birmingham / University Hospitals Birmingham, UK  
Roberta Elisa Rossi / Vincenzo Mazzaferro, Istituto Nazioanle dei Tumori, Milan, Italy  
Sherrie Bhoori / Vincenzo Mazzaferro, Istituto Nazioanle dei Tumori, Milan, Italy  
Holger Hinrichsen / Rainer Guenther, Department of Internal Medicine/Liver Unit, Germany  
Elton Dajti / Mariarosa Tamè, Sant'Orsola Hospital, Italy  
Felipe Alconchel / Pablo Ramirez, Virgen de la Arrixaca University Hospital, Spain  
Feng Su / Iris Liou, University of Washington, USA  
Graham Brady / Robert Fontana, University of Michigan, USA  
Gupse Adali, SBU Umraniye Training and Research Hospital, Turkey  
Gwilym Webb / Jane Collier, Oxford, UK  
Hannes Hagström / Staffan Wahlin, Karolinska univ. sjukhus, Huddinge, Sweden  
Hannes Hagström / Antti Oksanen, Karolinska University Hospital, Sweden  
Hannes Hagström / Lina Lindström, Karolinska University Hospital, Sweden  
Hannes Hagström, Karolinska University Hospital, Sweden  
Ignacio García-Juárez, Instituto Nacional de Ciencias Médicas Nutrición Salvador Zubirán, Mexico  
Isaac Ruiz / H  l  ne Castel, Centre Hospitalier de l'Universit   de Montr  al (CHUM), Canada  
Isaac Ruiz / Catherine Vincent, Centre Hospitalier de l'Universit   de Montr  al (CHUM), Canada  
Isaac Ruiz / Marc Bilodeau, Centre Hospitalier de l'Universit   de Montr  al (CHUM), Canada  
Jihane Benhamou, University of California Los Angeles, USA  
Joost PH Drenth, UMCG Groningen, The Netherlands

Joost PH Drenth / Eric Tjwa, Erasmus MC Rotterdam, Netherlands, The Netherlands  
Justin Boike / Josh Levitsky, Northwestern, USA  
Justin Boike / Christopher Moore, Northwestern, USA  
Justin Boike / Daniel Ganger, Northwestern, USA  
Justin Boike, Northwestern, USA  
Justin Chin / Varuna Aluvihare, King's College Hospital, UK  
Justin Chin, King's College Hospital, UK  
Katherine Marx / Maria Andreea Catana, Beth Israel Deaconess Medical Center, USA  
Konstantina Nikitopoulou / Raaj Praseedom, Cambridge University Hospitals NHS Foundation Trust, UK  
Konstantina Nikitopoulou / Paul Gibbs, Cambridge University Hospitals NHS Foundation Trust, UK  
Lance L Stein / Lance L Stein, Piedmont Atlanta Hospital, USA  
Logan Hobbs / Marwan Ghabril, IU Health University Health, USA  
Maíra Godoy / Maíra Godoy, Santa Isabel Hospital, Brazil  
Maria Andreea Catana / Micheal Curry, Beth Israel Deaconess Medical Center, USA  
Marianosa Tamè / Marianosa Tamè, Sant'Orsola Hospital, Bologna, Italy  
Matthew Armstrong / David Mutimer, Queen Elizabeth Birmingham / University Hospitals Birmingham, UK  
Matthew Armstrong / Dhiraj Tripathi, Queen Elizabeth Birmingham / University Hospitals Birmingham, UK  
Matthew Armstrong / Thamara, Queen Elizabeth Birmingham / University Hospitals Birmingham, UK  
Michael Andrew Yu / Ram Subramanian, Emory Transplant Center, USA  
Milena Mendes / Milena Mendes, Unidade de Transplante - Hospital Curry Cabral, Portugal  
Monica Cucco / Gianluca Svegliati Baroni, Department of Gastroenterology, Polytechnic University of Marche, Ancona, Italy  
Nikolas K. Gatselis / George N Dalekos, Department of Medicine and Research Laboratory of Internal Medicine, National Expertise Center of Greece in Autoimmune Liver Diseases, University Hospital of Larissa, Greece  
Nneka Ufere / Shoko Kimura, Massachusetts General Hospital, USA  
Nurun Tania / George Abouda, Hull University Teaching Hospitals, UK  
Patricia D Jones / Martin, University of Miami-JMH, USA  
Patricia D Jones / O'Brien, University of Miami-JMH, USA  
Patricia D Jones, University of Miami-JMH, USA  
Patricia D Jones, University of Miami-Jackson, USA  
Ponni Perumalswami / Joseph Odin, Mount Sinai Hospital, USA  
Ponni Perumalswami / Charissa Chang, Mount Sinai Hospital, USA  
Ponni Perumalswami, Mount Sinai Hospital, USA  
Ponni Perumalswami / Priya Grewal, Mount Sinai Hospital, USA  
Ponni Perumalswami / Thomas Schiano, Mount Sinai Hospital, USA  
Ponni Perumalswami / Jennifer Leong, Mount Sinai Hospital, USA  
Ponni Perumalswami / Jawad Ahmad, Mount Sinai Hospital, USA  
Ponni Perumalswami / Gene Im, Mount Sinai Hospital, USA  
Ponni Perumalswami / Leona Kim-Schluger, Mount Sinai Hospital, USA  
Ponni Perumalswami, New York University, USA  
Rahul Maheshwari, Piedmont Atlanta Hospital, USA  
Raymond Rubin / Rahul Maheshwari, Piedmont Atlanta Hospital, USA

S K Yadav / A S Soin, Medanta, The Medicity, India  
Sarah Townsend / Douglas Thorburn, Royal Free Hospital, UK  
Sarang Thaker / Adam Mikolajczyk, University of Illinois Hospital, USA  
Sarang Thaker / Sean Koppe, University of Illinois Hospital, USA  
Steven Masson / Mark Hudson, Newcastle, UK  
Steven Masson, Newcastle, UK  
Thines Karunakaran / Chirag Oza, Broomfield Hospital, UK  
Vanessa de Villa, The Medical City, Philippines  
Wim Laleman, University Hospitals Leuven, Belgium  
Xavier Verhelst / Xavier Verhelst, Ghent University Hospital, Belgium  
Zurabi Lominadze, University of Maryland Medical Center, USA



Supplementary figure 1 – Key outcomes after propensity score matching (model 1)

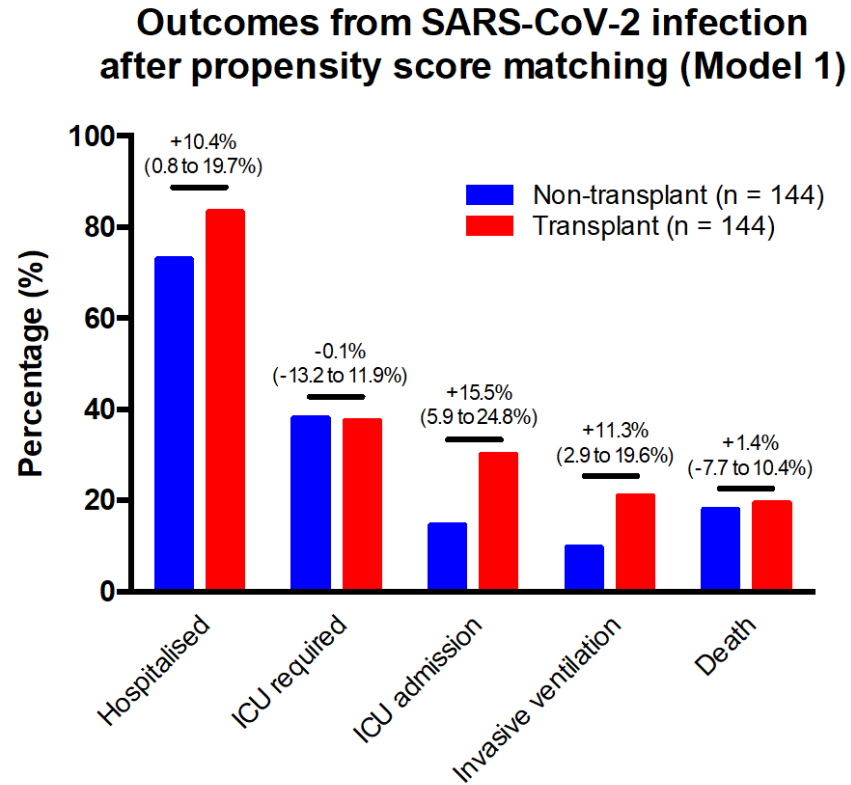

Comparison of major outcomes from SARS-CoV-2 infection between 144 liver transplant recipients and 144 patients without liver transplants after propensity score matching (model 1) based on age, sex, ethnicity, obesity, diabetes, hypertension and baseline serum creatinine. 95% confidence intervals for the difference in risk are shown in brackets and are calculated with Newcombe's method 10. ICU, intensive care unit.

Supplementary figure 2 – Key outcomes after propensity score matching (model 2)

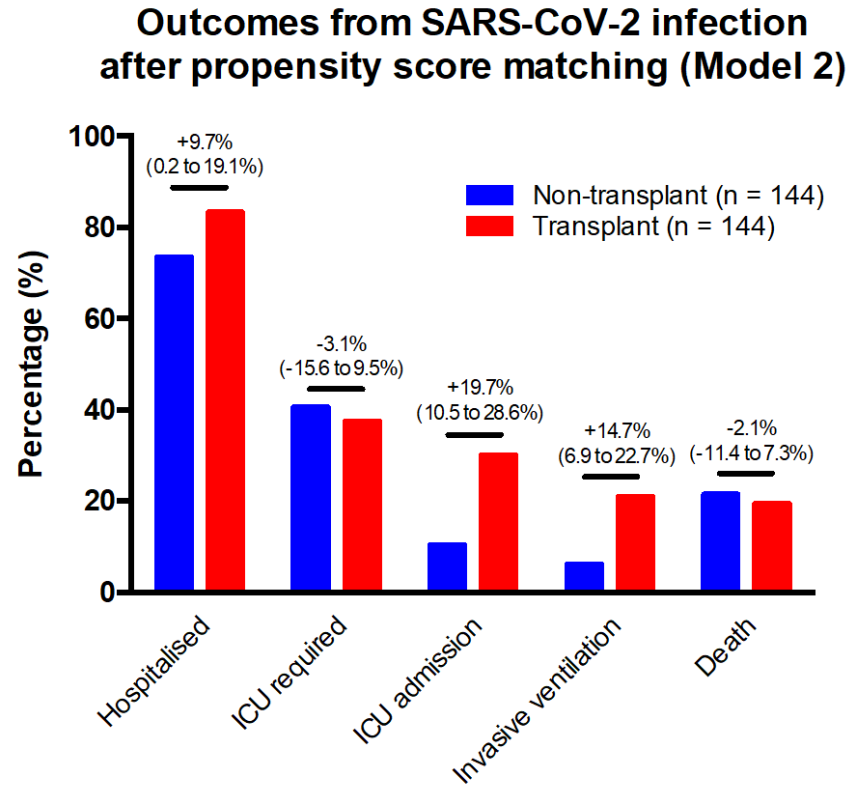

Comparison of major outcomes from SARS-CoV-2 infection between 144 liver transplant recipients and 144 patients without liver transplants after propensity score matching (model 2) based on age, interactions with age, sex, ethnicity, obesity, diabetes, hypertension and baseline serum creatinine. 95% confidence intervals for the difference in risk are shown in brackets and are calculated with Newcombe's method 10. ICU, intensive care unit.

Supplementary figure 3 – Key outcomes after propensity score matching (model 3)

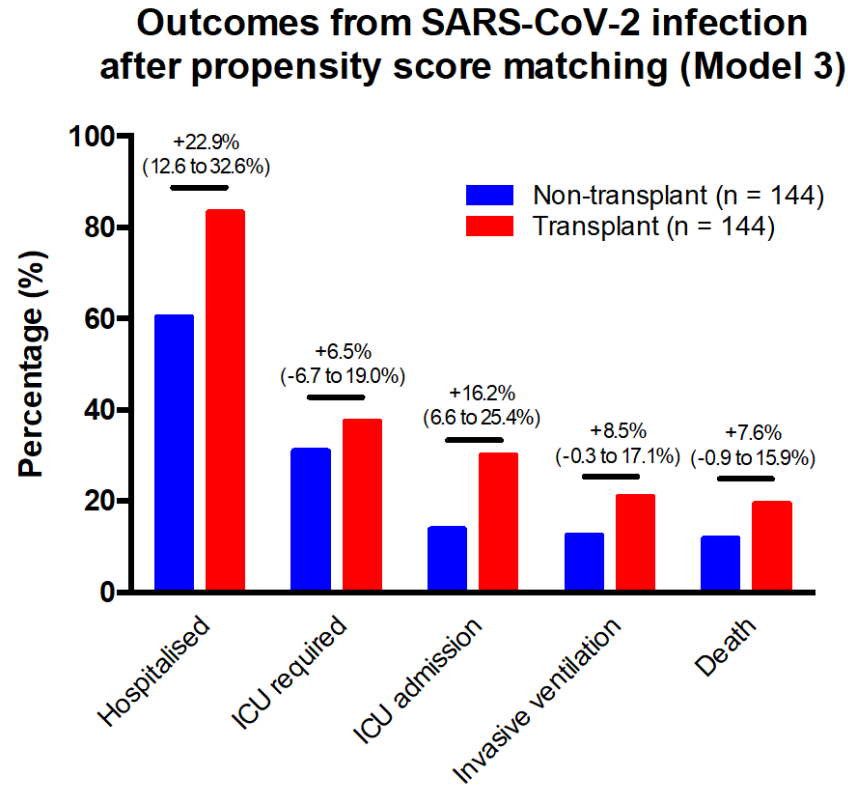

Comparison of major outcomes from SARS-CoV-2 infection between 144 liver transplant recipients and 144 patients without liver transplants after propensity score matching (model 3) based on age, interactions with age, sex, ethnicity, obesity, diabetes, hypertension, baseline serum creatinine, and interactions with baseline serum creatinine. 95% confidence intervals for the difference in risk are shown in brackets and are calculated with Newcombe's method 10. ICU, intensive care unit.

Supplementary figure 4 – Key outcomes after propensity score matching (model 4)

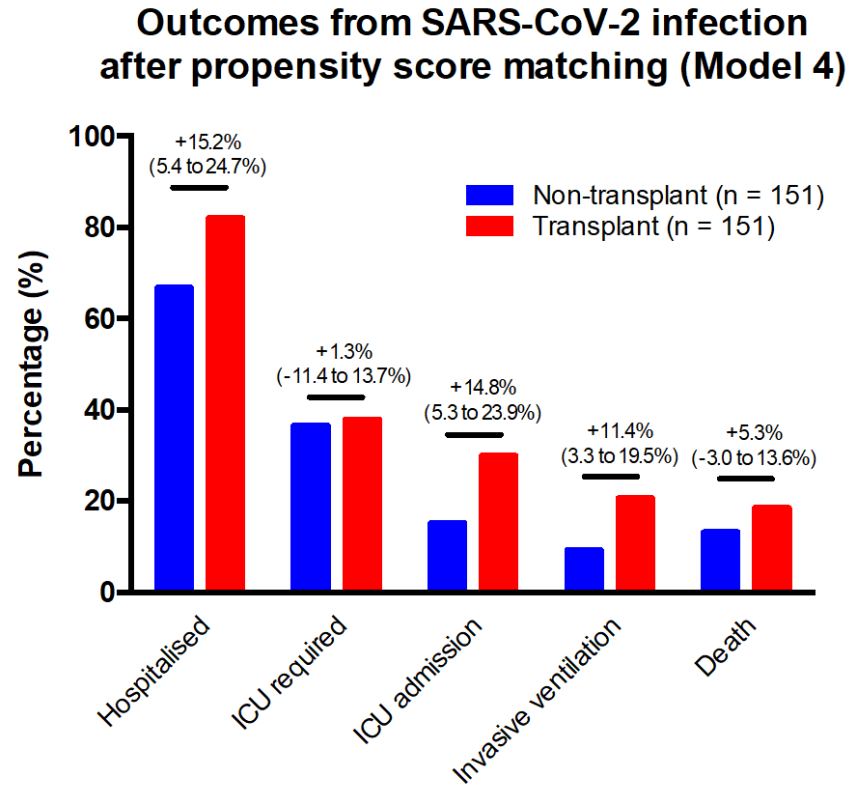

Comparison of major outcomes from SARS-CoV-2 infection between 151 liver transplant recipients and 151 patients without liver transplants after propensity score matching (model 4) based on age, interactions with age, sex, ethnicity, obesity, diabetes, and hypertension. 95% confidence intervals for the difference in risk are shown in brackets and are calculated with Newcombe's method 10. ICU, intensive care unit.

**Supplementary appendix – Data collection tool**

Inclusion Criteria:

- 1) Chronic liver disease or post-liver transplantation AND
- 2) Laboratory confirmed COVID 19 infection

Ideally this form should be completed after the patient has had COVID 19 for a long enough duration to experience complete recovery, discharge, or death.

If you have any questions, please reach out to [info@covid-hep.net](mailto:info@covid-hep.net)

**Reporter Information**

Name of reporter

\_\_\_\_\_

Email address of reporter

\_\_\_\_\_

Name of lead physician providing care for liver disease/post-liver transplant

\_\_\_\_\_

Name of center providing care for liver disease/post-liver transplant

\_\_\_\_\_

Name of hospital where patient received care for COVID 19 (enter 'NA' if patient not hospitalized)

\_\_\_\_\_

**Patient Information**

Is the patient >90 years of age?

- Yes
- No

Age

- 89
- 88
- 87
- 86
- 85
- 84
- 83
- 82
- 81
- 80
- 79
- 78
- 77
- 76
- 75
- 74
- 73
- 72
- 71
- 70
- 69
- 68
- 67
- 66
- 65
- 64
- 63
- 62
- 61
- 60
- 59
- 58
- 57
- 56
- 55
- 54
- 53
- 52
- 51
- 50
- 49
- 48
- 47
- 46
- 45
- 44
- 43
- 42
- 41
- 40
- 39
- 38
- 37
- 36
- 35
- 34
- 33
- 32
- 31
- 30
- 29
- 28
- 27
- 26
- 25
- 24
- 23
- 22
- 21

- 20
- 19
- 18
- 17
- 16
- 15
- 14
- 13
- 12
- 11
- 10
- 9
- 8
- 7
- 6
- 5
- 4
- 3
- 2
- 1



---

Country of residence

- Not in this country list ---
- land Islands
- Afghanistan
- Albania
- Algeria
- Andorra
- Angola
- Anguilla
- Antarctica
- Antigua and Barbuda
- Argentina
- Armenia
- Aruba
- Australia
- Austria
- Azerbaijan
- Bahamas
- Bahrain
- Bangladesh
- Barbados
- Belarus
- Belgium
- Belize
- Benin
- Bermuda
- Bhutan
- Bolivia, Plurinational State of
- Bosnia and Herzegovina
- Botswana
- Bouvet Island
- Brazil
- British Indian Ocean Territory
- Brunei Darussalam
- Bulgaria
- Burkina Faso
- Burundi
- Cte dlvoire
- Cambodia
- Cameroon
- Canada
- Cape Verde
- Cayman Islands
- Central African Republic
- Chad
- Chile
- China
- Christmas Island
- Cocos (Keeling) Islands
- Colombia
- Comoros
- Congo
- Congo, the Democratic Republic of the
- Cook Islands
- Costa Rica
- Croatia
- Cuba
- Cyprus
- Czech Republic
- Denmark
- Djibouti
- Dominica
- Dominican Republic
- Ecuador
- Egypt
- El Salvador
- Equatorial Guinea
- Eritrea
- Estonia
- Ethiopia

- Falkland Islands (Malvinas)
- Faroe Islands
- Fiji
- Finland
- France
- French Guiana
- French Polynesia
- French Southern Territories
- Gabon
- Gambia
- Georgia
- Germany
- Ghana
- Gibraltar
- Greece
- Greenland
- Grenada
- Guadeloupe
- Guatemala
- Guernsey
- Guinea
- Guinea-Bissau
- Guyana
- Haiti
- Heard Island and McDonald Islands
- Holy See (Vatican City State)
- Honduras
- Hong Kong
- Hungary
- Iceland
- India
- Indonesia
- Iran, Islamic Republic of
- Iraq
- Ireland
- Isle of Man
- Israel
- Italy
- Jamaica
- Japan
- Jersey
- Jordan
- Kazakhstan
- Kenya
- Kiribati
- Korea, Democratic Peoples Republic of
- Korea, Republic of
- Kuwait
- Kyrgyzstan
- Lao Peoples Democratic Republic
- Latvia
- Lebanon
- Lesotho
- Liberia
- Libyan Arab Jamahiriya
- Liechtenstein
- Lithuania
- Luxembourg
- Macao
- Macedonia, the former Yugoslav Republic of
- Madagascar
- Malawi
- Malaysia
- Maldives
- Mali
- Malta
- Marshall Islands
- Martinique
- Mauritania
- Mauritius
- Mayotte

- Mexico
- Micronesia, Federated States of
- Moldova, Republic of
- Monaco
- Mongolia
- Montenegro
- Montserrat
- Morocco
- Mozambique
- Myanmar
- Namibia
- Nauru
- Nepal
- Netherlands
- Netherlands Antilles
- New Caledonia
- New Zealand
- Nicaragua
- Niger
- Nigeria
- Niue
- Norfolk Island
- Northern Mariana Islands
- Norway
- Oman
- Pakistan
- Palau
- Palestinian Territory, Occupied
- Panama
- Papua New Guinea
- Paraguay
- Peru
- Philippines
- Pitcairn
- Poland
- Portugal
- Qatar
- R union
- Romania
- Russian Federation
- Rwanda
- Saint Barthlemy
- Saint Helena, Ascension and Tristan da Cunha
- Saint Kitts and Nevis
- Saint Lucia
- Saint Martin (French part)
- Saint Pierre and Miquelon
- Saint Vincent and the Grenadines
- Samoa
- San Marino
- Sao Tome and Principe
- Saudi Arabia
- Senegal
- Serbia
- Seychelles
- Sierra Leone
- Singapore
- Slovakia
- Slovenia
- Solomon Islands
- Somalia
- South Africa
- South Georgia and the South Sandwich Islands
- Spain
- Sri Lanka
- Sudan
- Suriname
- Svalbard and Jan Mayen
- Swaziland
- Sweden
- Switzerland

- Syrian Arab Republic
- Taiwan, Province of China
- Tajikistan
- Tanzania, United Republic of
- Thailand
- Timor-Leste
- Togo
- Tokelau
- Tonga
- Trinidad and Tobago
- Tunisia
- Turkey
- Turkmenistan
- Turks and Caicos Islands
- Tuvalu
- Uganda
- Ukraine
- United Arab Emirates
- United Kingdom
- United States
- Uruguay
- Uzbekistan
- Vanuatu
- Venezuela, Bolivarian Republic of
- Vietnam
- Virgin Islands, British
- Wallis and Futuna
- Western Sahara
- Yemen
- Zambia
- Zimbabwe

---

State of residence

- ALABAMA    ALASKA  
 AMERICAN SAMOA    ARIZONA  
 ARKANSAS    CALIFORNIA  
 COLORADO    CONNECTICUT  
 DELAWARE    DISTRICT OF COLUMBIA  
 FLORIDA    GEORGIA  
 GUAM    HAWAII    IDAHO  
 ILLINOIS    INDIANA  
 IOWA    KANSAS    KENTUCKY  
 LOUISIANA    MAINE  
 MARYLAND    MASSACHUSETTS  
 MICHIGAN    MINNESOTA  
 MISSISSIPPI    MISSOURI  
 MONTANA    NEBRASKA  
 NEVADA    NEW HAMPSHIRE  
 NEW JERSEY    NEW MEXICO  
 NEW YORK    NORTH CAROLINA  
 NORTH DAKOTA    OHIO  
 OKLAHOMA    OREGON  
 PENNSYLVANIA    PUERTO RICO  
 RHODE ISLAND    SOUTH CAROLINA  
 SOUTH DAKOTA    TENNESSEE  
 TEXAS    UTAH    VERMONT  
 VIRGIN ISLANDS    VIRGINIA  
 WASHINGTON    WEST VIRGINIA  
 WISCONSIN    WYOMING

---

Gender

- Female  
 Male  
 Other

---

Race/Ethnicity (may check more than one)

- White  
 Black or African American  
 American Indian / Native Alaskan  
 East Asian (incl. Chinese, Japanese, Korean)  
 South / South-East Asian (incl. Bangladeshi, Indian, Pakistani, Sri Lankan)  
 Native Hawaiian / Pacific Islander  
 Arabic  
 Other  
 Unknown

---

Other race/ethnicity

---

---

Hispanic ethnicity

- Hispanic/Latino  
 Not Hispanic/Latino  
 Unknown

---

Patient BMI category (in kg/m<sup>2</sup>)

- < 18.5 (Underweight)  
 18.5-24.9 (Normal weight)  
 25.0-29.9 (Pre-obesity)  
 30.0-34.9 (Obesity class I)  
 35.0-39.9 (Obesity class II)  
 >39.9 (Obesity class III)  
 Unknown

## Liver transplantation questions

Has the patient had a liver transplantation?

Yes

No

---

What year was the liver transplantation performed?

- Unknown
- 2020
- 2019
- 2018
- 2017
- 2016
- 2015
- 2014
- 2013
- 2012
- 2011
- 2010
- 2009
- 2008
- 2007
- 2006
- 2005
- 2004
- 2003
- 2002
- 2001
- 2000
- 1999
- 1998
- 1997
- 1996
- 1995
- 1994
- 1993
- 1992
- 1991
- 1990
- 1989
- 1988
- 1987
- 1986
- 1985
- 1984
- 1983
- 1982
- 1981
- 1980
- 1979
- 1978
- 1977
- 1976
- 1975
- 1974
- 1973
- 1972
- 1971
- 1970
- 1969
- 1968
- 1967
- 1966
- 1965

---

Indication for liver transplant (select all that apply)

- Decompensated cirrhosis
- Hepatocellular carcinoma
- Acute liver failure
- Other

---

Other indication for liver transplantation

---

Underlying aetiology of liver disease (select all that apply)

- Non-alcoholic fatty liver disease (NAFLD)
  - Alcohol-related liver disease (ALD)
  - Hepatitis C virus (HCV)
  - Hepatitis B virus (HBV)
  - Autoimmune hepatitis (AIH)
  - IgG4-related disease
  - Primary biliary cholangitis (PBC)
  - Primary sclerosing cholangitis (PSC)
  - Hemochromatosis
  - Wilson's disease
  - Other
- 

Other aetiology

---

Immunosuppression regimen at time of COVID 19 infection (select all that apply)

- Prednisone
  - Tacrolimus
  - Sirolimus
  - Everolimus
  - Cyclosporine
  - Mycophenolate mofetil (MMF)
  - Azathioprine
  - Cyclophosphamide
  - Other
  - Unknown
- 

What other immunosuppression medication was used at the time of COVID 19 infection?

---

Current prophylactic antimicrobial regimen (select all that apply)

- Trimethoprim/sulfamethoxazole or Co-trimoxazole
  - Dapsone
  - Pentamidine
  - Acyclovir/valacyclovir
  - Fluconazole
  - Ganciclovir/valganciclovir
  - Foscarnet
  - Other
  - Unknown
  - None
- 

Other prophylactic antimicrobial regimen

---



---

Does the patient have any of the following comorbidities (check all that apply)?

- Cardiovascular disease (coronary artery disease, heart failure, arrhythmia, etc.)
- Diabetes
- Asthma
- COPD
- Other Chronic Lung Disease (NOT asthma/COPD)
- Hypertension
- Non-HCC cancer
- History of stroke
- Chronic renal disease (CKD, etc.)
- Human immunodeficiency virus (HIV) infection
- Current cigarette smoker
- Current user of tobacco products other than cigarettes (vaping, etc)
- Current heavy alcohol use (>2 drinks/day for men, >1 drink/day for women)
- History of illicit drug use including injectable drugs or inhaled crack/cocaine but excluding marijuana

---

### Chronic liver disease questions

Aetiology of liver disease (select all that apply)

- Non-alcoholic fatty liver disease (NAFLD)
- Alcohol-related liver disease (ALD)
- Hepatitis C virus (HCV)
- Hepatitis B virus (HBV)
- Autoimmune hepatitis (AIH)
- IgG4-related disease
- Primary biliary cholangitis (PBC)
- Primary sclerosing cholangitis (PSC)
- Hemochromatosis
- Wilson's disease
- Other

---

Other aetiology

\_\_\_\_\_

---

Does the patient have cirrhosis?

- Yes
- No
- Unknown

---

Child Pugh grade prior to COVID 19 diagnosis?

- A
- B
- C
- Unknown

---

Did the patient have ascites prior to COVID 19 diagnosis?

- None
- Mild/moderate (diuretic responsive)
- Severe (diuretic refractory)
- Unknown

---

What was the worst grade of hepatic encephalopathy patient developed prior to COVID 19 diagnosis?

- None
- Grade 1 (trivial lack of awareness, shortened attention span)
- Grade 2 (lethargy, minimal disorientation, subtle personality change)
- Grade 3 (somnolence to semi-stupor but responsive to verbal stimuli, gross disorientation)
- Grade 4 (coma - unresponsive to verbal or noxious stimuli)
- Unknown

---

Has the patient ever had hepatocellular carcinoma?

- Yes
- No
- Unknown

---

What immunosuppression was the patient taking for IgG4-related disease at time of COVID 19 diagnosis (may check more than one)?

- None
- Corticosteroids
- Azathioprine
- Rituximab
- Other
- Unknown

---

Other immunosuppression for IgG4-related disease

---

---

Has the patient received steroids for alcoholic hepatitis recently (within 4 weeks of COVID 19 diagnosis)?

- Yes
- No
- Unknown

---

Treatment for primary biliary cholangitis (PBC) at time of COVID 19 diagnosis

- Ursodeoxycholic acid
- Obeticholic acid
- Fibrate
- Other
- No treatment
- Unknown

---

Other PBC treatments

---

---

Does the patient have inflammatory bowel disease (IBD)?

- Yes
- No
- Unknown

---

Immunosuppression medication(s) patient was taking for IBD at time of COVID 19 diagnosis

- Prednisone/prednisolone
- Budesonide
- Azathioprine
- Methotrexate
- Mycophenolate
- Infliximab
- Adalimumab
- Ustekinumab
- Vedolizumab
- Other
- None
- Unknown

---

Other immunosuppression for IBD

---

---

Treatment for autoimmune hepatitis (AIH) at time of COVID 19 diagnosis

- Prednisone/prednisolone
- Budesonide
- Azathioprine
- Mycophenolate
- Tacrolimus
- Other
- None
- Unknown

---

Other treatment for AIH

---

---

Hepatitis B surface antigen (HBsAg) positive

- Yes
- No
- Unknown

---

Treatment for HBV at the time of COVID 19 diagnosis

- Tenofovir
- Entecavir
- Interferon
- None
- Unknown

---

Did the patient have detectable hepatitis C virus (HCV) RNA at the time of or prior to COVID 19 diagnosis?

- Yes
- No
- Unknown

---

HCV genotype

- 1
- 2
- 3
- 4
- 5
- 6
- 7
- Unknown

---

Active treatment for HCV at the time of COVID 19 diagnosis

- Yes
- No
- Unknown

---

Does the patient have any of the following comorbidities (check all that apply)?

- Cardiovascular disease (coronary artery disease, heart failure, arrhythmia, etc.)
- Diabetes
- Asthma
- COPD
- Other Chronic Lung Disease (NOT asthma/COPD)
- Hypertension
- Non-HCC cancer
- History of stroke
- Chronic renal disease (CKD, etc.)
- Human immunodeficiency virus (HIV) infection
- Current cigarette smoker
- Current user of tobacco products other than cigarettes (vaping, etc)
- Current heavy alcohol use (>2 drinks/day for men, >1 drink/day for women)
- History of illicit drug use including injectable drugs or inhaled crack/cocaine but excluding marijuana

**Laboratory data (leave fields blank if unknown)**

• If COVID-19 suspected at presentation/admission then use recent pre-admission laboratory values as baseline.

• If hospital acquired COVID-19 suspected then please use first laboratory values obtained during hospitalisation as baseline.

Baseline serum sodium (mmol/L)

\_\_\_\_\_ (Before COVID 19 infection)

Nadir serum sodium (mmol/L)

\_\_\_\_\_ (During COVID 19 infection)

Creatinine units

µmol/L  mg/dl

Baseline serum creatinine

\_\_\_\_\_ (Before COVID 19 infection)

Peak serum creatinine

\_\_\_\_\_ (During COVID 19 infection)

Baseline prothrombin time (sec)

\_\_\_\_\_ (Before COVID 19 infection)

Peak prothrombin time (sec)

\_\_\_\_\_ (During COVID 19 infection)

Albumin units

g/dl  g/liter

Baseline albumin

\_\_\_\_\_ (Before COVID 19 infection)

Nadir albumin

\_\_\_\_\_ (During COVID 19 infection)

Total bilirubin units

µmol/L  mg/dl

Baseline total bilirubin

\_\_\_\_\_ (Before COVID 19 infection)

Peak total bilirubin

\_\_\_\_\_ (During COVID 19 infection)

Baseline alanine aminotransferase (ALT) (IU/L)

\_\_\_\_\_ (Before COVID 19 infection)

---

Peak alanine aminotransferase (ALT) (IU/L)

---

(During COVID 19 infection)

---

Baseline alkaline phosphatase (IU/L)

---

(Before COVID 19 infection)

---

Peak alkaline phosphatase (IU/L)

---

(During COVID 19 infection)

---

### COVID 19 questions

---

Was this lab confirmed COVID 19 infection?

- Yes  
 No  
 Unknown

---

What symptoms did the patient have at the time of COVID 19 diagnosis?

- GI symptoms (abdominal pain, diarrhea, nausea, vomiting)  
 Respiratory symptoms (shortness of breath, cough)  
 Both GI and respiratory symptoms  
 Neither GI or respiratory symptoms  
 Unknown

---

Did patient test positive for influenza at time of COVID 19 infection?

- Yes  
 No  
 Unknown

---

What complications did the patient develop during COVID 19 infection?

- New or worsening ascites  
 Spontaneous bacterial peritonitis  
 Hepatic encephalopathy  
 Non-variceal upper GI bleeding  
 Variceal upper GI bleeding  
 New requirement for renal replacement therapy (e.g. hemodialysis)  
 Other

---

Other complications of COVID 19 infection

---

---

What was the grade of ascites during COVID 19 infection?

- Mild/moderate  
 Severe  
 Unknown

---

What was the worst grade of hepatic encephalopathy during COVID 19 infection (based on West Haven Criteria)?

- Grade 1 (trivial lack of awareness, shortened attention span)  
 Grade 2 (lethargy, minimal disorientation, subtle personality change)  
 Grade 3 (somnolence to semi-stupor but responsive to verbal stimuli, gross disorientation)  
 Grade 4 (coma - unresponsive to verbal or noxious stimuli)  
 Unknown

---

Did the patient receive specific antiviral treatment for COVID 19 infection?

- Yes  
 No  
 Unknown

---

Which of the following treatment(s) did patient receive for COVID 19 (select all that apply)?

- Remdesivir
- Tocilizumab
- Lopinovir/ritonavir
- Chloroquine/hydroxychloroquine
- Ribavirin
- Interferon-alpha
- Other
- Unknown

---

Other type of antiviral treatment(s) received for COVID-19

---

---

What was the reason the patient did not receive COVID 19 antiviral treatment (select all that apply)?

- Elevated liver enzymes
- Underlying liver fibrosis/cirrhosis
- Other contraindication (eg AKI)
- Treatment not available
- Other
- Unknown

---

What was the reason the patient did not receive COVID 19 antiviral treatment?

---

---

Did the patient die?

- Yes
- No
- Unknown

---

What was the primary cause of death?

- Liver-related complications
- COVID 19-related lung disease
- Cardiogenic shock
- Other

---

Other cause of death

---

---

Has the patient been hospitalized?

- Yes
- No
- Unknown

---

Has the patient been discharged from the hospital?

- Yes
- No
- Unknown

---

Length of hospital stay (days)

---

---

Did patient receive invasive ventilation?

- Yes
- No
- Unknown

---

Did the patient receive non-invasive ventilation?

- Yes
- No
- Unknown

---

Was the patient admitted to an intensive care unit?

- Yes
- No
- Unknown

---

Why was the patient not admitted to an intensive care unit?

- Disease not severe enough
- Disease was severe enough but limited availability of intensive care unit
- Disease was severe enough but escalation to intensive care unit not felt to be appropriate.
- Unknown
